# Supplementary material
Source: PubMed Central journal article supplement (PMC9205616)
Supplement: NIHMS1579157-supplement-Supplemental_Publication_Material.pdf [file NIHMS1579157-supplement-Supplemental_Publication_Material.pdf]

**SUPPLEMENTAL MATERIAL**

**Supplemental Material 1. Reconstitution of acetylcholine for endothelial function testing in the cardiac catheterization lab**

- Drug used for testing - acetylcholine chloride intraocular solution (generic name) or Miochol-E (brand name)
- Drug comes packaged with a powder (20 mg) and a dilutant (2 ml)
- The powder is combined with dilutant
- 0.5 ml of this combination is mixed with 250 ml of normal saline to create a concentration of 20 mcg/ml acetylcholine

**Supplemental Table 1. Clinical Characteristics by Sex**

| <b>Variable</b>        | <b>Total<br/>(n=288)</b> | <b>Women<br/>(n=215)</b> | <b>Men<br/>(n=73)</b> |
|------------------------|--------------------------|--------------------------|-----------------------|
| Age, years             | 53.5±12.7                | 54.1±12.2                | 51.8±14.0             |
| <b>Race</b>            |                          |                          |                       |
| American               |                          |                          |                       |
| Indian/Alaska Native   | 8 (2.8)                  | 5 (2.3)                  | 3 (4.1)               |
| Asian or East Indian   | 28 (9.7)                 | 23 (10.7)                | 5 (6.8)               |
| Black/African          |                          |                          |                       |
| American               | 15 (5.2)                 | 9 (4.2)                  | 6 (8.2)               |
| Hispanic or Latino     | 30 (10.4)                | 28 (13.0)                | 2 (2.7)               |
| Native Hawaiian or     |                          |                          |                       |
| Other Pacific Islander | 2 (0.7)                  | 1 (0.5)                  | 1 (1.4)               |
| Caucasian              | 181 (62.8)               | 130 (60.5)               | 51 (69.9)             |
| Other                  | 23 (8.0)                 | 18 (8.4)                 | 5 (6.8)               |
| Missing                | 1 (0.3)                  | 1 (0.5)                  | 0 (0.0)               |
| Hypertension           | 136 (47.2)               | 111 (51.6)               | 25 (34.2)             |
| Diabetes mellitus      | 55 (19.1)                | 44 (20.5)                | 11 (15.1)             |
| Dyslipidemia           | 163 (56.6)               | 120 (55.8)               | 43 (58.9)             |
| <b>Smoking</b>         |                          |                          |                       |
| Former                 | 43 (14.9)                | 28 (13.0)                | 15 (20.5)             |
| Current                | 42 (14.6)                | 26 (12.1)                | 16 (21.9)             |
| Missing                | 1 (0.3)                  | 1 (0.5)                  | 0 (0.0)               |

|                          |                    |                    |                    |
|--------------------------|--------------------|--------------------|--------------------|
| Family history of CAD    | 79 (27.4)          | 66 (30.7)          | 13 (17.8)          |
| BMI, kg/m <sup>2</sup>   | 28.7±6.5           | 28.8±7.0           | 28.2±4.8           |
| BSA, m <sup>2</sup>      | 1.89±0.24          | 1.82±0.21          | 2.08±0.23          |
| Medications              |                    |                    |                    |
| Aspirin                  | 188 (65.3)         | 133 (62.1)         | 55 (75.3)          |
| Plavix                   | 18 (6.2)           | 12 (5.6)           | 6 (8.2)            |
| Beta blockers            | 115 (39.9)         | 88 (41.1)          | 27 (37.0)          |
| Calcium channel          |                    |                    |                    |
| blocker                  | 56 (19.4)          | 37 (17.3)          | 19 (26.0)          |
| ACEI/ARB                 | 48 (16.7)          | 36 (16.8)          | 12 (16.4)          |
| Diuretics                | 34 (11.8)          | 29 (13.6)          | 5 (6.8)            |
| Statins                  | 146 (50.7)         | 104 (48.6)         | 42 (57.5)          |
| Nitrates                 | 107 (37.2)         | 78 (36.4)          | 29 (39.7)          |
| Missing                  | 1 (0.3)            | 1 (0.3)            | 0 (0)              |
| Total cholesterol, mg/dL | 167.6±41.4         | 173.5±42.2         | 150.2±33.4         |
| Lipoprotein(a), mg/dL    | 14.6 [6.1, 33.0]   | 14.4 [5.7, 32.9]   | 16.3 [8., 33.6]    |
| Triglycerides, mg/dL     | 75.0 [48.0, 110.0] | 75.5 [49.2, 110.0] | 65.0 [44.0, 107.0] |
| LDL, mg/dL               | 95.75±34.76        | 99.14±35.72        | 85.88±29.92        |
| HDL, mg/dL               | 54.0±16.9          | 55.6±16.9          | 49.3±16.1          |
| Fasting glucose, mg/dL   | 100.5±22.8         | 100.0±23.4         | 101.9±20.9         |
| HbA1c, %                 | 5.6±0.8            | 5.7±0.8            | 5.6±0.6            |
| Insulin, μU/mL           | 8.0 [5.0, 13.0]    | 8.0 [5.0, 13.5]    | 8.0 [5.0, 13.0]    |
| Homocysteine, μmol/L     | 8.3±3.1            | 7.9±2.9            | 9.5±3.5            |

|                        |                 |                   |                 |
|------------------------|-----------------|-------------------|-----------------|
| HOMA index*            | 1.9 [1.1, 3.4]  | 1.9 [1.1, 3.4]    | 1.9 [1.2, 3.4]  |
| hs-CRP, mg/dL,         | 1.4 [0.6, 3.9]  | 1.5 [0.8, 4.1]    | 0.8 [0.4, 2.2]  |
| SAQ scores†            |                 |                   |                 |
| Physical limitation    | 68.6±14.2       | 68.4±14.5         | 68.9±13.7       |
| Anginal stability      | 39.4±24.6       | 38.4±25.3         | 42.6±22.5       |
| Anginal frequency      | 59.5±23.1       | 57.7±23.2         | 65.1±22.2       |
| Treatment satisfaction | 85.9±17.2       | 85.3±17.5         | 86.3±16.3       |
| Quality of life        | 50 [33.3, 58.3] | 41.7 [33.3, 58.3] | 50 [33.3, 58.3] |

---

\* HOMA index=insulin ( $\mu\text{U}/\text{m}$ ) $\times$ [glucose (mg/dl)/405]; † Lower SAQ score represents worse symptoms. BMI=body mass index; BSA=body surface area; CAD=coronary artery disease; HbA1c=hemoglobin A 1c; HDL=high-density lipoprotein; HOMA=homeostasis model assessment; hs-CRP=high sensitivity C-reactive protein; LDL=low-density lipoprotein; SAQ=Seattle angina questionnaire

**Supplemental Table 2. Estimated change in MLD in  $\mu$ meter for every 10 $\mu$ g change in Ach dosage adjusted for body surface area**

| Slopes             | Women (estimates of MLD change/10 $\mu$ g Ach) |                         | Men (estimates of MLD change/10 $\mu$ g Ach) |                         |
|--------------------|------------------------------------------------|-------------------------|----------------------------------------------|-------------------------|
|                    | Ach                                            | Endothelial dysfunction | Ach                                          | Endothelial dysfunction |
| doses >20 $\mu$ g  | -7.0 [-35, 21]                                 | -22 [-48, 3.6]          | 16 [-29, 32]                                 | -38 [-65, -12]          |
| doses >50 $\mu$ g  | 9.6 [-3.9, 23]                                 | 1.7 [-9.3, 13]          | 18 [1.9, 35]                                 | -14 [-28, -1.2]         |
| doses >100 $\mu$ g | -1.1[-11, 8.4]                                 | -31 [-15, 8.9]          | 7.4 [-7.1, 22]                               | -19 [-33, -5.8]         |

The median change in MLD/10  $\mu$ g of Ach when the curves were adjusted for BSA lies within the confidence interval of the change in MLD/10  $\mu$ g of Ach with the model that was unadjusted for BSA, suggesting no significant difference in the results. Slope estimates presented in  $\mu$ meter/10 $\mu$ g; Ach = acetylcholine

**Supplemental Table 3. Estimated change in the MLD/10 µg of Ach when endothelial dysfunction is defined as %MLD constriction >20%, ≥1% and ≥50% after IC Ach**

| Endothelial dysfunction = constriction >20% |                                          |                         |                                        |                         |
|---------------------------------------------|------------------------------------------|-------------------------|----------------------------------------|-------------------------|
| Slopes                                      | Women (estimates of MLD change/10µg Ach) |                         | Men (estimates of MLD change/10µg Ach) |                         |
|                                             | No endothelial dysfunction               | Endothelial dysfunction | No endothelial dysfunction             | Endothelial dysfunction |
| doses >20                                   | -2.7 (-31.8 – 26.4)                      | -21.6 (-47.4 – 4.2)     | 3.9 (-27.3 – 35.1)                     | -37.4 (-63.8 – 11.0)    |
| doses >50                                   | 9.5 (-4.4 – 23.3)                        | 1.8 (-9.3 – 12.8)       | 16.1 (-0.67 – 32.8)                    | -14.0 (-27.3 – 0.76)    |
| doses >100                                  | -2.4 (-12.2 – 7.3)                       | -2.9 (-14.9 – 9.1)      | 4.2 (-10.8 – 19.1)                     | -18.7 (-32.3 – 5.1)     |
| Endothelial dysfunction = constriction ≥1%  |                                          |                         |                                        |                         |
| doses >20                                   | 21 (-24 – 66)                            | -23 (-45 – -2.0)        | 38 (-10 – 87)                          | -38 (-60 – -15)         |
| doses >50                                   | 11 (-13 – 34)                            | 5.7 (-3.8 – 15)         | 28 (0.79 – 55)                         | -8.1 (-20 – 3.3)        |
| doses >100                                  | -6.1 (-21 – 9.1)                         | 5.5 (-3.3 – 14)         | 11 (-12 – 33)                          | -8.4 (-19 – 2.7)        |
| Endothelial dysfunction = constriction ≥50% |                                          |                         |                                        |                         |
| doses >20                                   | -9.2 (-31 – 13)                          | -76 (-120 – -36)        | -7.1 (-30 – 16)                        | -75 (-120 – -35)        |
| doses >50                                   | 3.8 (-5.8 – 13)                          | -16 (-36 – 3.2)         | 5.8 (-6.5 – 18)                        | -16 (-37 – 5.1)         |
| doses >100                                  | 3.1 (-5 – 11)                            | 2.1 (-20 – 24)          | 5.1 (-6.8 – 17)                        | 2.8 (-17 – 23)          |

The median change in the estimates of MLD/10 µg of Ach when endothelial dysfunction is defined as %MLD constriction ≥1% and ≥ 50% after IC Ach lie within the confidence interval

for the definition used in the current manuscript (constriction  $>20\%$ ), suggesting no significant difference in the results with a different threshold for the definition of endothelial dysfunction.

MLD = minimal lumen diameter
